# Supplementary material for: Bridging of Neisseria gonorrhoeae lineages across sexual networks in the HIV pre-exposure prophylaxis era
Source: PubMed Central journal article supplement (PMC6728426; doi:10.1038/s41467-019-12053-4), 2019-09-05
Supplement: 41467_2019_12053_MOESM4_ESM.pdf [file 41467_2019_12053_MOESM4_ESM.pdf]

## **Description of Additional Supplementary Files**

File Name: Supplementary Data 1

Description: Metadata, accessions, and results for isolates used in this study

File Name: Supplementary Data 2

Description: Additional MLST 9363 strains used from the Gonococcal Isolate Surveillance Project
